# Supplementary material for: Locally-ordered A-site vacancy assisted photoluminescence enhancement in simply rare-earth doped perovskite oxide
Source: Royal Society of Chemistry journal article supplement (doi:10.1039/d2ma00843b), 2022-01-01
Supplement: d2ma00843b1.pdf [file d2ma00843b1.pdf]

## Supplementary Informations

### **Locally-ordered A-site vacancy assisted photoluminescence enhancement in simply rare-earth doped perovskite oxide**

*Lei Xia<sup>a</sup>, Jiyang Xie<sup>a,b</sup>, and Wanbiao Hu<sup>a,b\*</sup>*

<sup>a</sup> Key Laboratory of LCR Materials and Devices of Yunnan Province, School of Materials and Energy, Yunnan University, Kunming 650091, P. R. China

<sup>b</sup> Electron Microscopy Center, Yunnan University, Kunming 650091, P. R. China

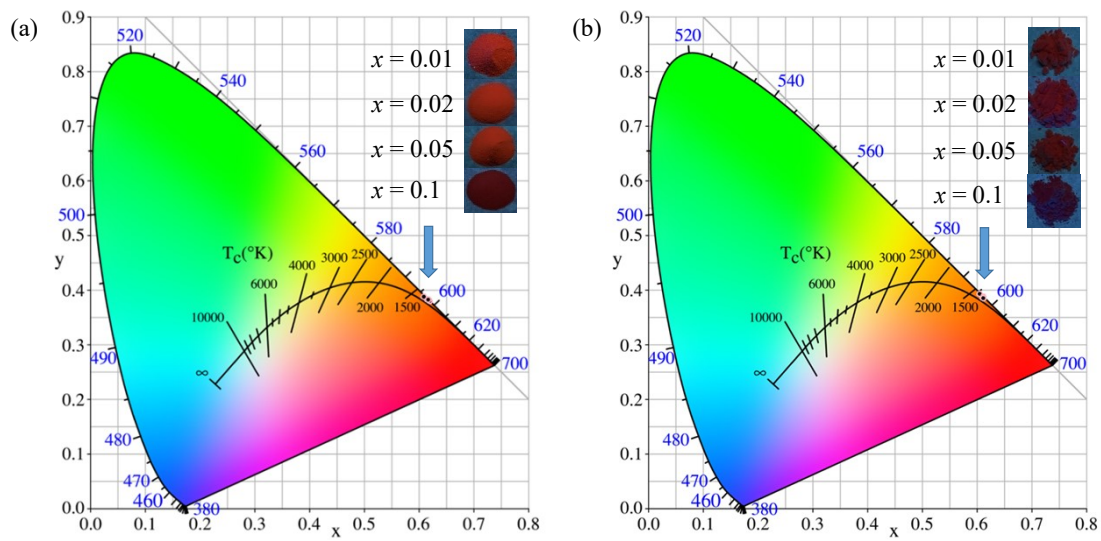

**Figure S1.** The CIE chromaticity coordinates of (a)  $V_A$ -CST- $x$  and (b) CST- $x$  ( $x=0.01$ , 0.02, 0.05 and 0.1) samples excited at 408 nm, respectively. It can be seen that the emission colors are located in the reddish-orange region of the standard CIE diagram, consistent with the results from the PL emission spectra (Figure 1b,d). The luminescence features (color purity in Table S1) of  $V_A$ -CST- $x$  displays much better than those of CST- $x$ .

**Table S1.** Parameters of photoluminescence features (CIE, and CP) of V<sub>A</sub>-CST-*x* andCST-*x* (*x*=0.01, 0.02, 0.05 and 0.1) samples.

| Samples                       | Doping level ( <i>x</i> ) | Chromaticity |          | Color purity<br>(CP) (%) |
|-------------------------------|---------------------------|--------------|----------|--------------------------|
|                               |                           | coordinates  |          |                          |
|                               |                           | <i>x</i>     | <i>y</i> |                          |
| V <sub>A</sub> -CST- <i>x</i> | 0.01                      | 0.6195       | 0.3798   | 78.82                    |
|                               | 0.02                      | 0.6164       | 0.3829   | 78.23                    |
|                               | 0.05                      | 0.6167       | 0.3825   | 78.27                    |
|                               | 0.1                       | 0.6101       | 0.3881   | 76.98                    |
| CST- <i>x</i>                 | 0.01                      | 0.6050       | 0.3927   | 76.02                    |
|                               | 0.02                      | 0.6104       | 0.3872   | 77.00                    |
|                               | 0.05                      | 0.6114       | 0.3883   | 77.31                    |
|                               | 0.1                       | 0.6117       | 0.3856   | 77.23                    |

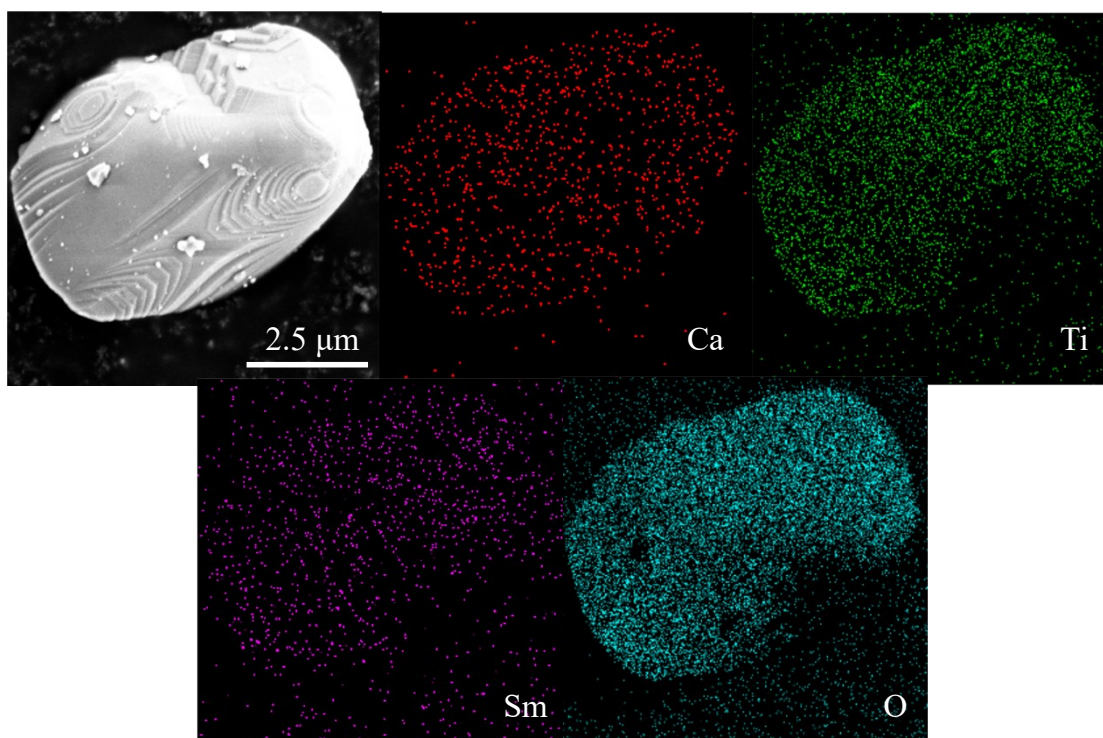

**Figure S2.** The SEM-EDS pattern of V<sub>A</sub>-CST-0.1 and the element mapping for elements Ca, Ti, Sm and O. It can be seen that all the cations, especially the dopants Sm<sup>3+</sup>, are uniformly distributed, confirming the successful incorporation.

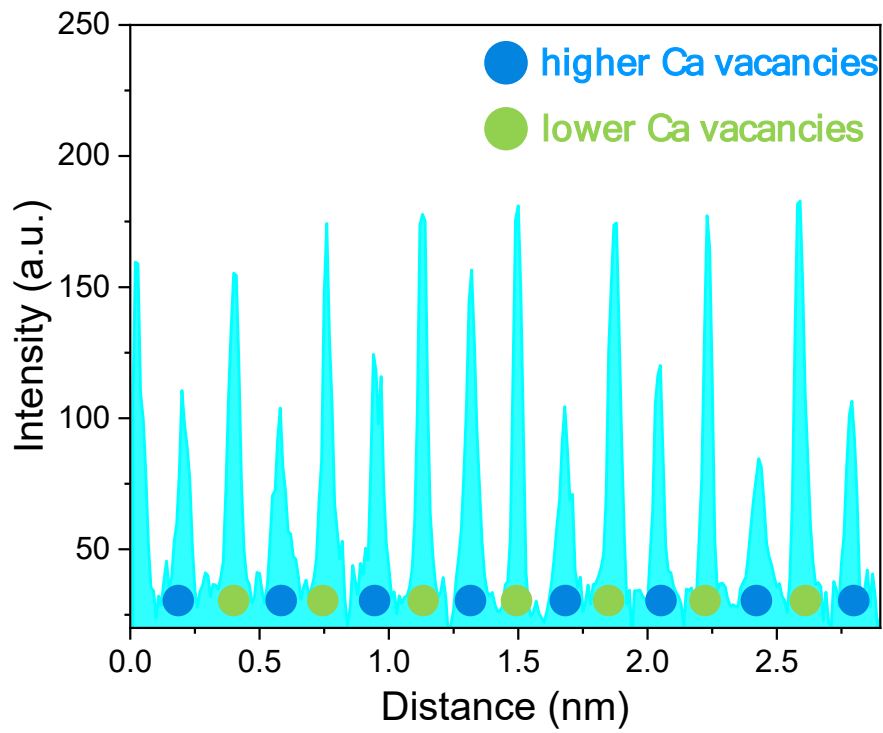

**Figure S3.** The intensity profiles of Ca vacancies in  $V_A$ -CST-0.02. It can be seen that the distribution of higher  $V_A$  and lower  $V_A$  is very obvious. This is well consistent with the ordered arrangements of superlattice-like structure.
